# Supplementary material
Source: PubMed Central journal article supplement (PMC6364527)
Supplement: CJN.05080418SupplementaryData.pdf [file CJN.05080418SupplementaryData.pdf]

**Table S1 Comparison of Statistical Results from Primary and Exploratory Models**

| <b>Outcome</b>                                       | <b>Control Patients<br/>N = 6078</b> | <b>Patients Continuing<br/>Loop Diuretics <sup>a</sup><br/>N = 5219</b> |
|------------------------------------------------------|--------------------------------------|-------------------------------------------------------------------------|
| <b>Mortality</b>                                     |                                      |                                                                         |
| Primary model adjusted HR (95% CI) <sup>b</sup>      | 1 (ref)                              | 0.92 (0.84, 1.01)                                                       |
| Exploratory model adjusted HR (95% CI) <sup>c</sup>  | 1 (ref)                              | 0.93 (0.85, 1.02)                                                       |
| <b>Hospitalization</b>                               |                                      |                                                                         |
| Primary model adjusted IRR (95% CI) <sup>b</sup>     | 1 (ref)                              | 0.93 (0.89, 0.98)                                                       |
| Exploratory model adjusted IRR (95% CI) <sup>c</sup> | 1 (ref)                              | 0.94 (0.91, 0.96)                                                       |
| <b>Intradialytic hypotension</b>                     |                                      |                                                                         |
| Primary model adjusted IRR (95% CI) <sup>b</sup>     | 1 (ref)                              | 0.95 (0.92, 0.99)                                                       |
| Exploratory model adjusted IRR (95% CI) <sup>c</sup> | 1 (ref)                              | 0.96 (0.95, 0.96)                                                       |

<sup>a</sup> Patients continuing loop diuretics refilled a prescription for a loop diuretic immediately following dialysis initiation whereas control patients did not.

<sup>b</sup> Adjusted for: age, vascular access type, serum albumin, diabetes and heart failure.

<sup>c</sup> Adjusted for: age, vascular access type, serum albumin, diabetes, heart failure and nephrology care prior to dialysis initiation.

Abbreviations: CI, confidence interval; HR, hazard ratio; IRR, incidence rate ratio; p25, 25<sup>th</sup> percentile; p75, 75<sup>th</sup> percentile; SD, standard deviation.

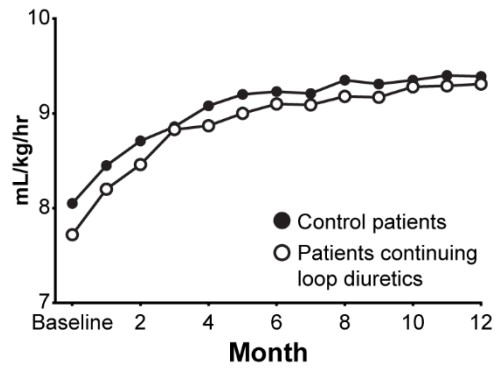

**Figure S1. Longitudinal ultrafiltration rates were not different for patients continuing loop diuretics and control patients.** Plotted are mean monthly values adjusted for age, vascular access type, serum albumin, diabetes and heart failure.

**Table S2: Baseline Characteristics of Control and Loop Patients with Significant Urine Output**

|                                                                     | <b>Control Patients<br/>N = 1863</b> | <b>Patients Continuing<br/>Loop Diuretics <sup>a</sup><br/>N = 2086</b> | <b>Standardized<br/>Difference<br/>(%)</b> |
|---------------------------------------------------------------------|--------------------------------------|-------------------------------------------------------------------------|--------------------------------------------|
| <b>Age, years</b> mean $\pm$ SD<br>median [p25, p75]                | 69 $\pm$ 12<br>70 [62, 77]           | 67 $\pm$ 12<br>68 [60, 76]                                              | -11.4                                      |
| <b>Gender</b> n (%)                                                 |                                      |                                                                         | 0.9                                        |
| Male                                                                | 1012 (54)                            | 1118 (54)                                                               |                                            |
| Female                                                              | 851 (46)                             | 968 (46)                                                                |                                            |
| <b>Race</b> n (%)                                                   |                                      |                                                                         | 3.4                                        |
| White                                                               | 1192 (64)                            | 1299 (62)                                                               |                                            |
| Black                                                               | 381 (21)                             | 447 (21)                                                                |                                            |
| Hispanic                                                            | 167 (9)                              | 200 (10)                                                                |                                            |
| Asian                                                               | 63 (3)                               | 69 (3)                                                                  |                                            |
| Other/unknown                                                       | 60 (3)                               | 71 (3)                                                                  |                                            |
| <b>Vascular access</b> n (%)                                        |                                      |                                                                         | 13.6                                       |
| Arteriovenous fistula                                               | 334 (18)                             | 552 (27)                                                                |                                            |
| Arteriovenous graft                                                 | 100 (5)                              | 156 (7)                                                                 |                                            |
| Central venous catheter                                             | 1419 (76)                            | 1367 (66)                                                               |                                            |
| Missing/Unknown                                                     | < 11 <sup>b</sup>                    | 11 (1)                                                                  |                                            |
| <b>Etiology of ESKD</b> n (%)                                       |                                      |                                                                         | 6.7                                        |
| Diabetes                                                            | 1006 (54)                            | 1194 (57)                                                               |                                            |
| Hypertension                                                        | 518 (28)                             | 532 (26)                                                                |                                            |
| Other                                                               | 339 (18)                             | 360 (17)                                                                |                                            |
| <b>CCI score</b> mean $\pm$ SD<br>median [p25, p75]                 | 6.1 $\pm$ 1.6<br>6.0 [5.0, 7.0]      | 6.0 $\pm$ 1.5<br>6.0 [5.0, 7.0]                                         | -7.0                                       |
| <b>Vintage, days</b> mean $\pm$ SD<br>median [p25, p75]             | 23 $\pm$ 20<br>18 [9, 28]            | 22 $\pm$ 18<br>18 [9, 27]                                               | -6.8                                       |
| <b>Prior transplant, n (%)</b>                                      | < 11 <sup>b</sup>                    | < 11 <sup>b</sup>                                                       | NA                                         |
| <b>Nephrology care prior to<br/>dialysis initiation, n (%)</b>      |                                      |                                                                         | 18.2                                       |
| Yes                                                                 | 1288 (66)                            | 1548 (74)                                                               |                                            |
| No                                                                  | 388 (21)                             | 323 (15)                                                                |                                            |
| Did not report                                                      | 253 (14)                             | 215 (10)                                                                |                                            |
| <b>Diabetes</b> n (%)                                               | 1413 (76)                            | 1634 (78)                                                               | 5.6                                        |
| <b>Heart failure</b> n (%)                                          | 196 (11)                             | 223 (11)                                                                | -1.3                                       |
| <b>CVD</b> n (%)                                                    | 15 (1)                               | 25 (1)                                                                  | 4.7                                        |
| <b>CAD</b> n (%)                                                    | 184 (10)                             | 202 (10)                                                                | -2.6                                       |
| <b>Predialysis SBP, mm Hg</b><br>mean $\pm$ SD<br>median [p25, p75] | 147 $\pm$ 20<br>147 [133, 160]       | 147 $\pm$ 19<br>147 [134, 160]                                          | -0.3                                       |

|                                                                         | <b>Control Patients<br/>N = 1863</b> | <b>Patients Continuing<br/>Loop Diuretics <sup>a</sup><br/>N = 2086</b> | <b>Standardized<br/>Difference<br/>(%)</b> |
|-------------------------------------------------------------------------|--------------------------------------|-------------------------------------------------------------------------|--------------------------------------------|
| <b>Postdialysis SBP, mm Hg</b><br>mean ± SD<br>median [p25, p75]        | 145 ± 19<br>144 [132, 158]           | 145 ± 19<br>144 [132, 158]                                              | -1.7                                       |
| <b>Ultrafiltration volume, L</b><br>mean ± SD<br>median [p25, p75]      | 2.1 ± 1.2<br>1.9 [1.3, 2.7]          | 2.0 ± 1.3<br>1.9 [1.2, 2.6]                                             | -3.0                                       |
| <b>Ultrafiltration rate, mL/kg/h</b><br>mean ± SD<br>median [p25, p75]  | 8.0 ± 9.2<br>6.9 [4.8, 9.6]          | 7.5 ± 9.5<br>6.5 [4.4, 9.0]                                             | -2.5                                       |
| <b>Prescribed treatment time, min</b><br>mean ± SD<br>median [p25, p75] | 210 ± 50<br>210 [180, 236]           | 212 ± 81<br>210 [180, 235]                                              | 1.7                                        |
| <b>Delivered treatment time, min</b><br>mean ± SD<br>median [p25, p75]  | 209 ± 26<br>211 [186, 228]           | 209 ± 27<br>210 [185, 227]                                              | -1.4                                       |
| <b>Target weight, kg</b> mean ± SD<br>median [p25, p75]                 | 84.4 ± 23.2<br>80.9 [68.0, 98.0]     | 86.6 ± 24.3<br>82.9 [70.0, 99.8]                                        | 10.3                                       |
| <b>Post dialysis weight, kg</b><br>mean ± SD<br>median [p25, p75]       | 84.1 ± 23.0<br>80.4 [67.7, 97.3]     | 86.3 ± 24.3<br>82.5 [69.8, 99.4]                                        | 10.3                                       |
| <b>Interdialytic weight gain, kg</b><br>mean ± SD<br>median [p25, p75]  | 2.0 ± 1.3<br>1.9 [1.2, 2.6]          | 1.9 ± 1.4<br>1.8 [1.1, 2.5]                                             | -2.3                                       |
| <b>Maximum urine volume, mL</b><br>mean ± SD<br>median [p25, p75]       | 1029 ± 866<br>850 [500, 1300]        | 1221 ± 895<br>1050 [650, 1550]                                          | 21.9                                       |
| <b>Albumin, g/dL</b> mean ± SD<br>median [p25, p75]                     | 3.5 ± 0.5<br>3.6 [3.3, 3.9]          | 3.6 ± 0.5<br>3.7 [3.4, 3.9]                                             | 12.4                                       |
| <b>Potassium, mEq/L</b> mean ± SD<br>median [p25, p75]                  | 4.3 ± 0.6<br>4.3 [3.9, 4.7]          | 4.3 ± 0.6<br>4.3 [3.9, 4.7]                                             | 0.7                                        |

<sup>a</sup> Patients continuing loop diuretics refilled a prescription for a loop diuretic immediately following dialysis initiation whereas control patients did not.

<sup>b</sup> Data cells designated as “< 11” contain 10 or fewer individuals. The data use agreement prohibits publishing exact values in data cells falling below this threshold.

Abbreviations: CAD, coronary artery disease; CCI, Charlson comorbidity index; CVD, cerebrovascular disease; ESRD, end-stage kidney disease; PVD, peripheral vascular disease; SBP, systolic blood pressure.

**Table S3: Clinical Outcome Event Rates among Patients with Significant Urine Output**

|                                     | <b>Control Patients<br/>N = 2086</b> | <b>Patients Continuing<br/>Loop Diuretics <sup>a</sup><br/>N = 1863</b> |
|-------------------------------------|--------------------------------------|-------------------------------------------------------------------------|
| <b>At-risk time, patient-years</b>  |                                      |                                                                         |
| Total                               | 1567                                 | 1804                                                                    |
| Mean ± SD                           | 0.8 ± 0.3                            | 0.9 ± 0.3                                                               |
| Median [p25, p75]                   | 1.0 [0.9, 1.0]                       | 1.0 [1.0, 1.0]                                                          |
| <b>Mortality</b>                    |                                      |                                                                         |
| Deaths                              | 248                                  | 215                                                                     |
| Crude rate, deaths/patient-year     | 0.16                                 | 0.12                                                                    |
| Adjusted HR (95% CI)                | 1 (ref)                              | 0.88 (0.73, 1.06)                                                       |
| <b>Hospitalization</b>              |                                      |                                                                         |
| Admissions                          | 2924                                 | 2980                                                                    |
| Crude rate, admissions/patient-year | 1.87                                 | 1.65                                                                    |
| Adjusted IRR (95% CI)               | 1 (ref)                              | 0.94 (0.89, 0.99)                                                       |
| <b>Intradialytic hypotension</b>    |                                      |                                                                         |
| Episodes                            | 31,031                               | 36,272                                                                  |
| Crude rate, episodes/patient-year   | 19.8                                 | 20.1                                                                    |
| Adjusted IRR (95% CI)               | 1 (ref)                              | 1.03 (1.02, 1.05)                                                       |

<sup>a</sup> Patients continuing loop diuretics refilled a prescription for a loop diuretic immediately following dialysis initiation whereas control patients did not.

Outcomes adjusted for: age, vascular access type, serum albumin, diabetes and heart failure. Abbreviations: CI, confidence interval; HR, hazard ratio; IRR, incidence rate ratio; p25, 25<sup>th</sup> percentile; p75, 75<sup>th</sup> percentile; SD, standard deviation.
